# Supplementary material for: A highly sensitive fluorescent nanoprobe for the amplified detection of formaldehyde
Source: Royal Society of Chemistry journal article supplement (doi:10.1039/d2ay01139e), 2022-01-01
Supplement: d2ay01139e1.pdf [file d2ay01139e1.pdf]

## Supporting Information

# A highly sensitive fluorescent nanoprobe for amplified detection of formaldehyde

Yali Qiao<sup>\*a1</sup>, Fang Lu<sup>b</sup> and Xingwang Zheng<sup>b</sup>

---

<sup>a</sup> State Key Laboratory of Plateau Ecology and Agriculture, Qinghai University, Xining 810016, P. R. China

<sup>b</sup> Key Laboratory of Analytical Chemistry for Life Science of Shaanxi Province, School of Chemistry & Chemical Engineering, Shaanxi Normal University, Xi'an 710062, P. R. China

Corresponding author, Yali Qiao.

E-mail addresses: Qiaoylyl@163.com

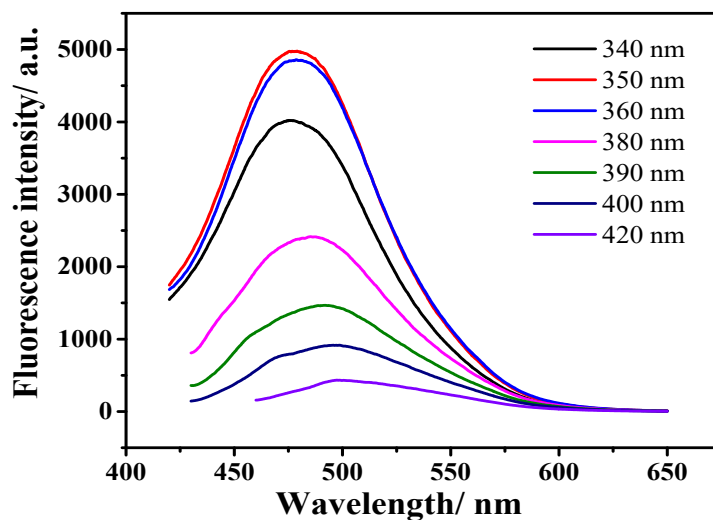

**Fig. S1** Fluorescence spectra of PEI-PNPs (prepared with 50 mg mL<sup>-1</sup> of PEI) in 10 mM pH 7.0 PB buffer at different excitation wavelengths.

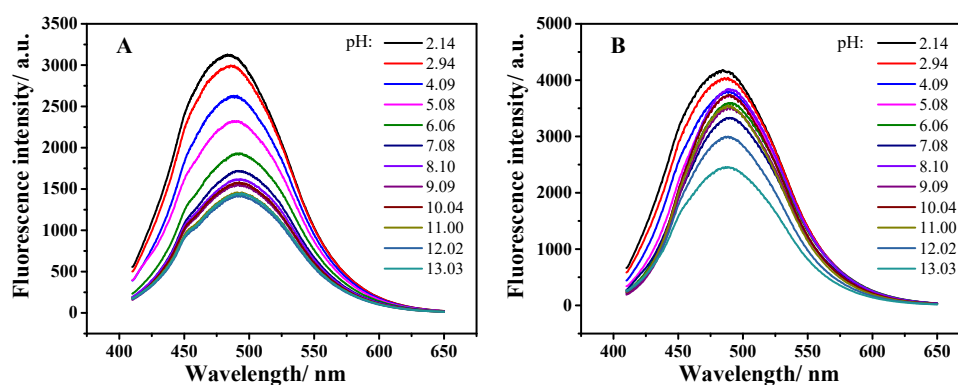

**Fig. S2** (A) Fluorescence spectra of the PEI-PNPs at different pH values in the absence of FA; (B) Fluorescence spectra of the PEI-PNPs at different pH values in the presence of 150 μg mL<sup>-1</sup> of FA for 10 min. (the excitation wavelength was set at  $\lambda_{ex} = 390$  nm).

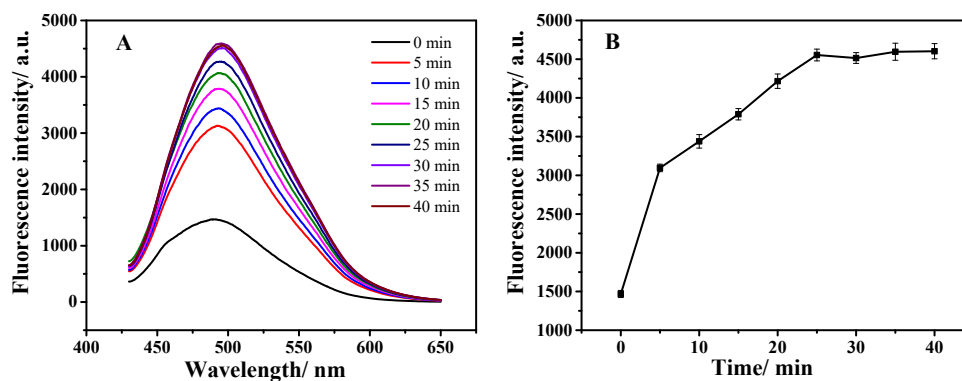

**Fig. S3** Fluorescence spectra (A) and intensities change (B) of the PEI-PNPs with increase of time upon addition of 200 μg mL<sup>-1</sup> of FA (the excitation wavelength was set at  $\lambda_{ex} = 390$  nm).

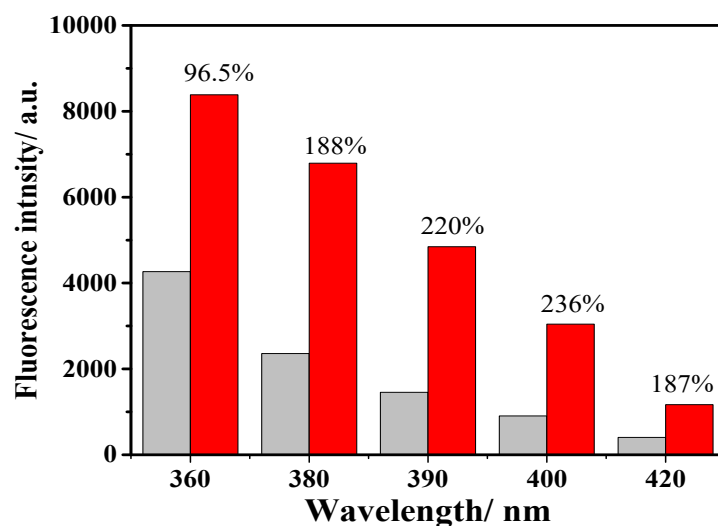

**Fig. S4** Fluorescence intensity and change efficiency ( $F-F_0/F_0$ ) of the PEI-PNPs before (gray) and after (red) addition of 200 μg mL<sup>-1</sup> of FA under the different excitation wavelength.

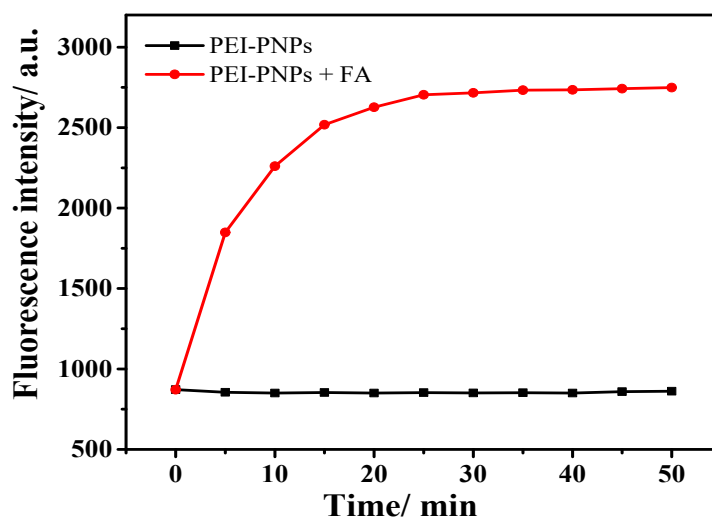

**Fig. S5** Time-dependent fluorescence intensity of pristine PEI-PNPs (black) and in the presence of 150 μg mL<sup>-1</sup> of FA (red) under continuous irradiation at 390 nm in 10 mM pH 7.0 PB buffer.

**Table S1** Comparison of fluorescent probes for FA.

| <b>Probes</b>                    | <b>Reagents</b>            | <b>Detection limit/<math>\mu</math>M</b> | <b>Response time/min</b> | <b>Reference</b>                          |
|----------------------------------|----------------------------|------------------------------------------|--------------------------|-------------------------------------------|
| <b>aza-Cope-based probes</b>     |                            |                                          |                          |                                           |
| FP1                              | PBS buffer                 | 10                                       | > 180                    | J. Am. Chem. Soc., 2015, 137:10890.       |
| FAP-1                            | PBS buffer                 | 5                                        | > 120                    | J. Am. Chem. Soc., 2015, 137, 10886.      |
| TPNF                             | PBS buffer<br>0.5%<br>DMSO | 5                                        | 180                      | Sens. Actuators B Chem., 2017, 241, 1050. |
| AENO                             | PBS buffer<br>20% DMF      | 0.057                                    | < 150                    | Talanta, 2016, 160, 645.                  |
| <b>Formimine-based probes</b>    |                            |                                          |                          |                                           |
| Na-FA                            | PBS buffer<br>1% DMSO      | 0.71                                     | 30                       | Angew. Chem. Int. Ed., 2016, 55, 3356.    |
| Na-FA-Lyso                       | PBS buffer<br>1% DMSO      | 5.02                                     | 30                       | Anal. Chem. ,2016, 88, 9359.              |
| HN-Chitosan                      | HCl<br>solution            | 1.66                                     | < 1                      | ACS Sens., 2018, 3, 2394.                 |
| <b>aminal-based probes</b>       |                            |                                          |                          |                                           |
| R6-FA                            | PBS buffer<br>50% DMF      | 0.77                                     | < 1                      | Chem. Commun., 2016, 52, 9582.            |
| <b>PEI-PNPs-<br/>based probe</b> | <b>PB buffer</b>           | <b>10</b>                                | <b>10</b>                | <b>This paper</b>                         |
